# Supplementary material for: DNA binding properties of human Cdc45 suggest a function as molecular wedge for DNA unwinding
Source: Nucleic Acids Res. 2013 Nov 28;42(4):2308–19. doi: 10.1093/nar/gkt1217 (PMC3936751; doi:10.1093/nar/gkt1217)
Supplement: Supplementary Data [file supp_gkt1217_nar-02855-m-2013-File004.docx]

<?xml version="1.0" encoding="UTF-8"?>
